# Supplementary material
Source: PubMed Central journal article supplement (PMC3137092)
Supplement: supp_M111.235028_jbc.M111.235028-1.pdf [file supp_M111.235028_jbc.M111.235028-1.pdf]

## SUPPLEMENTARY MATERIAL

### TABLES

Supp table 1: Genes with hypermethylated promoters in MDS

Supp Table 2: Genes with hypomethylated promoters in MDS

### FIGURES

Supp Figure 1: KLF3 hypermethylated by MassArray sequencing

Supp Figure 2: Pathway analysis of hypermethylated genes in MDS (Ingenuity)

**Supplementary Table 1: Significantly hypermethylated refseq gene loci with mean log (HpaII/MspI) ratios**

| Symbol    | Mean HELP ratio MDS | Mean HELP ratio Normals | p-value | Gene                                                                                                  | Significantly underexpressed in MDS BM CD34+ cells* | Deleted in any MDS samples |
|-----------|---------------------|-------------------------|---------|-------------------------------------------------------------------------------------------------------|-----------------------------------------------------|----------------------------|
| ABCC1     | -1.28               | 0.17                    | 0.0136  | ATP-binding cassette, sub-family C (CFTR/MRP), member 1                                               |                                                     |                            |
| ABCF3     | -1.98               | -0.82                   | 0.0003  | ATP-binding cassette, sub-family F (GCN20), member 3                                                  | +                                                   | +                          |
| ACAD8     | -0.76               | 0.83                    | 0.0009  | acyl-Coenzyme A dehydrogenase family, member 8                                                        |                                                     |                            |
| ADAM30    | -2.24               | -0.91                   | 0.0039  | ADAM metallopeptidase domain 30                                                                       | +                                                   | +                          |
| ADAMTS15  | -1.16               | 0.03                    | 0.0070  | ADAM metallopeptidase with thrombospondin type 1 motif, 15                                            | NA                                                  |                            |
| ALDH3A1   | -0.97               | 0.38                    | 0.0009  | aldehyde dehydrogenase 3 family, member A1                                                            |                                                     |                            |
| AMDHD2    | -2.56               | -1.44                   | 0.0002  | amidohydrolase domain containing 2                                                                    |                                                     |                            |
| ANGPTL2   | -2.44               | -0.57                   | 0.0021  | angiopoietin-like 2                                                                                   | +                                                   |                            |
| ANTXR1    | -0.01               | 1.27                    | 0.0090  | anthrax toxin receptor 1                                                                              |                                                     |                            |
| ARHGEF4   | -0.29               | 1.08                    | 0.0037  | Rho guanine nucleotide exchange factor (GEF) 4                                                        | +                                                   |                            |
| ARMC1     | -0.07               | 1.01                    | 0.0032  | armadillo repeat containing 1                                                                         |                                                     |                            |
| ARRDC4    | -1.12               | -0.08                   | 0.0034  | arrestin domain containing 4                                                                          | NA                                                  |                            |
| ATAD5     | -1.79               | -0.73                   | 0.0001  | ATPase family, AAA domain containing 5                                                                |                                                     |                            |
| ATG2B     | -2.41               | -1.26                   | 0.0030  | ATG2 autophagy related 2 homolog B ( <i>S. cerevisiae</i> )                                           |                                                     | +                          |
| ATP5S     | -4.03               | -2.87                   | 0.0128  | ATP synthase, H <sup>+</sup> transporting, mitochondrial F <sub>0</sub> complex, subunit s (factor B) | +                                                   |                            |
| C11ORF30  | -0.52               | 0.68                    | 0.0002  | chromosome 11 open reading frame 30                                                                   | NA                                                  |                            |
| C14ORF126 | -3.34               | -2.23                   | 0.0003  | chromosome 14 open reading frame 126                                                                  | NA                                                  |                            |
| C16ORF46  | -3.14               | -2.03                   | 0.0001  | chromosome 16 open reading frame 46                                                                   | NA                                                  |                            |
| C16ORF73  | -0.91               | 0.32                    | 0.0397  | chromosome 16 open reading frame 73                                                                   | NA                                                  |                            |
| C1ORF113  | 0.10                | 1.26                    | 0.0016  | chromosome 1 open reading frame 113                                                                   | NA                                                  |                            |
| C3ORF59   | -1.90               | -0.33                   | 0.0006  | chromosome 3 open reading frame 59                                                                    | NA                                                  | +                          |
| C6ORF47   | -0.70               | 0.33                    | 0.0329  | chromosome 6 open reading frame 47                                                                    | +                                                   |                            |
| CA8       | -3.51               | -2.33                   | 0.0287  | carbonic anhydrase VIII                                                                               |                                                     |                            |
| CCDC115   | -0.53               | 0.54                    | 0.0445  | coiled-coil domain containing 115                                                                     | NA                                                  |                            |
| CCDC60    | -0.35               | 0.70                    | 0.0270  | coiled-coil domain containing 60                                                                      | NA                                                  |                            |
| CCRN4L    | -1.65               | -0.30                   | 0.0000  | CCR4 carbon catabolite repression 4-like ( <i>S. cerevisiae</i> )                                     | +                                                   |                            |
| CDADC1    | -2.76               | -1.74                   | 0.0034  | cytidine and dCMP deaminase                                                                           |                                                     |                            |

|          |       |       |        |                                                                             |    |   |
|----------|-------|-------|--------|-----------------------------------------------------------------------------|----|---|
|          |       |       |        | domain containing 1                                                         |    |   |
| CDC42SE1 | -2.43 | -1.18 | 0.0008 | CDC42 small effector 1                                                      | +  | + |
| CDR2L    | -1.27 | 0.23  | 0.0000 | cerebellar degeneration-related protein 2-like                              | NA |   |
| CLEC4D   | -2.32 | -1.17 | 0.0061 | C-type lectin domain family 4, member D                                     | NA |   |
| CXORF39  | -1.69 | -0.51 | 0.0139 | chromosome X open reading frame 39                                          | NA |   |
| CXORF42  | -2.48 | -1.36 | 0.0017 | chromosome X open reading frame 42                                          | NA |   |
| DAB2IP   | -1.38 | -0.15 | 0.0001 | DAB2 interacting protein                                                    | NA |   |
| DDAH2    | -0.85 | 0.18  | 0.0007 | dimethylarginine dimethylaminohydrolase 2                                   | NA |   |
| DNAH11   | -1.65 | -0.48 | 0.0181 | dynein, axonemal, heavy chain 11                                            | NA |   |
| DOCK2    | -1.76 | -0.32 | 0.0137 | dedicator of cytokinesis 2                                                  | +  |   |
| DOCK4    | -3.03 | -1.95 | 0.0004 | dedicator of cytokinesis 4                                                  | +  | + |
| DTX3L    | -2.38 | -1.08 | 0.0239 | deltex 3-like (Drosophila)                                                  | NA | + |
| DUSP4    | -0.81 | 0.26  | 0.0214 | dual specificity phosphatase 4                                              | +  | + |
| ECHDC1   | -0.13 | 1.06  | 0.0156 | enoyl Coenzyme A hydratase domain containing 1                              |    |   |
| EFCAB2   | -0.83 | 0.34  | 0.0057 | EF-hand calcium binding domain 2                                            | +  |   |
| EFTUD1   | -0.79 | 0.25  | 0.0000 | elongation factor Tu GTP binding domain containing 1                        |    |   |
| EIF2C3   | -1.77 | -0.56 | 0.0001 | eukaryotic translation initiation factor 2C, 3                              |    |   |
| EIF3A    | -1.61 | -0.44 | 0.0003 | eukaryotic translation initiation factor 3, subunit A                       |    |   |
| ENG      | -0.89 | 0.17  | 0.0157 | endoglin                                                                    |    |   |
| FAM177A1 | -1.28 | 0.24  | 0.0004 | family with sequence similarity 177, member A1                              | NA |   |
| FARP1    | -1.58 | -0.33 | 0.0005 | FERM, RhoGEF (ARHGEF) and pleckstrin domain protein 1 (chondrocyte-derived) |    |   |
| GEMIN4   | -2.36 | -1.32 | 0.0047 | gem (nuclear organelle) associated protein 4                                | NA |   |
| GIT2     | -2.09 | -0.97 | 0.0320 | G protein-coupled receptor kinase interacting ArfGAP 2                      | NA |   |
| GLT25D2  | -2.68 | -1.38 | 0.0179 | glycosyltransferase 25 domain containing 2                                  |    |   |
| GOLT1A   | -2.16 | -1.14 | 0.0015 | golgi transport 1 homolog A (S. cerevisiae)                                 | NA | + |
| GSPT1    | -1.98 | -0.97 | 0.0038 | G1 to S phase transition 1                                                  |    |   |
| H1FNT    | -3.26 | -2.12 | 0.0066 | H1 histone family, member N, testis-specific                                | NA |   |
| HCN1     | -1.91 | -0.50 | 0.0013 | hyperpolarization activated cyclic nucleotide-gated potassium channel 1     | NA |   |
| HIST1H4J | -0.51 | 0.73  | 0.0006 | histone cluster 1, H4j                                                      |    | + |
| HMGN3    | -0.56 | 0.55  | 0.0095 | high mobility group nucleosomal binding domain 3                            | NA |   |
| HOXB3    | -1.68 | -0.67 | 0.0078 | homeobox B3                                                                 |    | + |

|              |        |       |        |                                                                                           |    |   |
|--------------|--------|-------|--------|-------------------------------------------------------------------------------------------|----|---|
| HSPG2        | -2.02  | -1.01 | 0.0003 | heparan sulfate proteoglycan 2                                                            |    |   |
| IMP4         | -0.53  | 0.54  | 0.0445 | IMP4, U3 small nucleolar ribonucleoprotein, homolog (yeast)                               |    |   |
| IQGAP2       | -1.07  | -0.01 | 0.0265 | IQ motif containing GTPase activating protein 2                                           | +  |   |
| ITPK1        | -3.48  | -2.39 | 0.0001 | inositol 1,3,4-triphosphate 5/6 kinase                                                    | +  | + |
| KCNN2        | 0.3    | 0.09  | 0.04   | potassium intermediate/small conductance calcium-activated channel, subfamily N, member 2 |    | + |
| JMJD2A       | -0.50  | 0.77  | 0.0003 | jumonji domain containing 2A                                                              | +  | + |
| JMJD2B       | -0.62  | 0.58  | 0.0017 | jumonji domain containing 2B                                                              | +  | + |
| JPH4         | -3.26  | -2.15 | 0.0006 | junctophilin 4                                                                            | NA |   |
| KIAA0232     | -2.37  | -1.37 | 0.0113 | KIAA0232                                                                                  | +  |   |
| KLF3         | -0.796 | 0.163 | 0.005  | Kruppel like factor 3                                                                     | NA | + |
| LEPREL1      | -0.56  | 0.55  | 0.0013 | leprecan-like 1                                                                           |    |   |
| LMLN         | -1.88  | -0.71 | 0.0257 | leishmanolysin-like (metallopeptidase M8 family)                                          | NA |   |
| LOC100129034 | -0.92  | 0.16  | 0.0060 | hypothetical protein LOC100129034                                                         | NA |   |
| LOC100131654 | -1.35  | -0.31 | 0.0115 | hypothetical protein LOC100131654                                                         | NA |   |
| LOC646903    | -1.15  | -0.14 | 0.0107 | hypothetical LOC646903                                                                    | NA |   |
| LTA4H        | -1.63  | -0.62 | 0.0018 | leukotriene A4 hydrolase                                                                  |    |   |
| MBP          | -0.07  | 1.04  | 0.0003 | myelin basic protein                                                                      |    |   |
| MDS1         | -0.88  | 0.38  | 0.0174 | myelodysplasia syndrome 1                                                                 |    | + |
| MED12        | -1.00  | 0.86  | 0.0024 | mediator complex subunit 12                                                               | +  |   |
| MGC24125     | -1.80  | -0.42 | 0.0046 | hypothetical protein MGC24125                                                             | NA |   |
| MRP63        | -0.20  | 1.35  | 0.0382 | mitochondrial ribosomal protein 63                                                        | +  |   |
| MST152       | -2.04  | -0.94 | 0.0099 | MSTP152                                                                                   | NA |   |
| MT1X         | -1.31  | -0.16 | 0.0029 | metallothionein 1X                                                                        |    |   |
| MTCH1        | -1.00  | 0.13  | 0.0307 | mitochondrial carrier homolog 1 (C. elegans)                                              | +  |   |
| NICN1        | -1.03  | -0.01 | 0.0001 | nicolin 1                                                                                 | NA | + |
| NME5         | -0.95  | 0.19  | 0.0033 | non-metastatic cells 5, protein expressed in (nucleoside-diphosphate kinase)              | +  |   |
| N-PAC        | -1.26  | -0.19 | 0.0083 | cytokine-like nuclear factor n-pac                                                        | +  |   |
| NUP107       | -2.14  | -1.09 | 0.0069 | nucleoporin 107kDa                                                                        |    |   |
| NXT2         | -2.72  | -1.66 | 0.0051 | nuclear transport factor 2-like export factor 2                                           |    | + |
| OBFC1        | -2.73  | -0.37 | 0.0486 | oligonucleotide/oligosaccharide-binding fold containing 1                                 | +  |   |
| ODC1         | -1.97  | -0.94 | 0.0001 | ornithine decarboxylase 1                                                                 |    |   |
| OXTR         | -2.51  | -1.22 | 0.0046 | oxytocin receptor                                                                         | +  |   |
| PACS2        | -1.29  | -0.16 | 0.0000 | phosphofurin acidic cluster sorting protein 2                                             |    |   |
| PAPSS2       | -1.60  | -0.38 | 0.0002 | 3'-phosphoadenosine 5'-phosphosulfate synthase 2                                          |    |   |
| PCDH12       | -1.01  | 0.10  | 0.0129 | protocadherin 12                                                                          |    |   |
| PCDHB11      | -2.10  | -0.73 | 0.0015 | protocadherin beta 11                                                                     | NA |   |
| PLAGL2       | -0.32  | 0.76  | 0.0060 | pleiomorphic adenoma gene-like 2                                                          | +  |   |

|          |       |       |        |                                                                                                      |    |   |
|----------|-------|-------|--------|------------------------------------------------------------------------------------------------------|----|---|
| PGGT1B   | -3.5  | -2.1  | 0.04   | protein geranylgeranyltransferase type I, beta subunit                                               |    | + |
| PP13439  | -1.64 | -0.60 | 0.0060 | hypothetical LOC100128046                                                                            | NA |   |
| PPARGC1A | -0.66 | 0.38  | 0.0142 | peroxisome proliferator-activated receptor gamma, coactivator 1 alpha                                | +  |   |
| PPP1R15B | -2.59 | -1.30 | 0.0000 | protein phosphatase 1, regulatory (inhibitor) subunit 15B                                            | NA | + |
| PRKAR1A  | -0.44 | 0.63  | 0.0011 | protein kinase, cAMP-dependent, regulatory, type I, alpha (tissue specific extinguisher 1)           | NA | + |
| PRPF8    | -0.11 | 1.22  | 0.0048 | PRP8 pre-mRNA processing factor 8 homolog ( <i>S. cerevisiae</i> )                                   |    |   |
| PRES     | -1.4  | -0.3  | 0.04   | prestin (motor protein)                                                                              |    | + |
| RAB2A    | -1.84 | 0.58  | 0.0052 | RAB2A, member RAS oncogene family                                                                    | +  |   |
| RAB36    | -2.62 | -1.45 | 0.0009 | RAB36, member RAS oncogene family                                                                    | +  |   |
| RALGPS1  | -2.40 | -1.39 | 0.0036 | Ral GEF with PH domain and SH3 binding motif 1                                                       |    |   |
| REXO1    | -2.27 | -0.07 | 0.0013 | REX1, RNA exonuclease 1 homolog ( <i>S. cerevisiae</i> )                                             |    |   |
| RHBDD3   | 0.02  | 1.24  | 0.0016 | rhomboid domain containing 3                                                                         |    |   |
| RNF135   | -1.66 | -0.56 | 0.0092 | ring finger protein 135                                                                              | NA |   |
| RPL39    | -1.52 | 0.07  | 0.0394 | ribosomal protein L39                                                                                |    |   |
| RUNX3    | -1.25 | 0.15  | 0.0075 | runt-related transcription factor 3                                                                  | +  | + |
| SEZ6     | -1.11 | -0.06 | 0.0021 | seizure related 6 homolog (mouse)                                                                    | +  |   |
| SFMBT2   | -0.64 | 0.87  | 0.0012 | Scm-like with four mbt domains 2                                                                     | NA |   |
| SH2B3    | -1.36 | -0.22 | 0.0090 | SH2B adaptor protein 3                                                                               | +  |   |
| SHE      | -2.54 | -1.44 | 0.0020 | Src homology 2 domain containing E                                                                   | NA | + |
| SLC35D1  | -2.55 | -1.43 | 0.0030 | solute carrier family 35 (UDP-glucuronic acid/UDP-N-acetylgalactosamine dual transporter), member D1 | +  |   |
| SMG6     | -2.70 | -1.61 | 0.0002 | Smg-6 homolog, nonsense mediated mRNA decay factor ( <i>C. elegans</i> )                             | +  |   |
| SNRPF    | -0.73 | 0.59  | 0.0061 | small nuclear ribonucleoprotein polypeptide F                                                        |    | + |
| SNX33    | -0.55 | 0.59  | 0.0048 | sorting nexin 33                                                                                     | NA |   |
| STRN     | -2.79 | -1.70 | 0.0078 | striatin, calmodulin binding protein                                                                 | +  |   |
| SV2A     | -1.19 | -0.02 | 0.0007 | synaptic vesicle glycoprotein 2A                                                                     |    |   |
| SYK      | -1.42 | -0.16 | 0.0008 | spleen tyrosine kinase                                                                               |    |   |
| SYNE1    | -1.45 | -0.40 | 0.0033 | spectrin repeat containing, nuclear envelope 1                                                       |    |   |
| TKT      | -1.92 | -0.90 | 0.0000 | transketolase                                                                                        | +  |   |
| TM7SF4   | -2.50 | -1.24 | 0.0092 | transmembrane 7 superfamily member 4                                                                 |    |   |
| TM9SF2   | -1.01 | 0.26  | 0.0037 | transmembrane 9 superfamily member 2                                                                 | NA |   |
| TMEM99   | -0.32 | 1.02  | 0.0004 | transmembrane protein 99                                                                             | NA |   |
| TNFAIP9  | -2.3  | -0.7  | 0.03   | tumor necrosis factor, alpha-induced                                                                 |    | + |

|         |       |       |        |                                                                     |    |  |
|---------|-------|-------|--------|---------------------------------------------------------------------|----|--|
|         |       |       |        | protein 9                                                           |    |  |
| TOMM20L | -1.89 | -0.53 | 0.0031 | translocase of outer mitochondrial membrane 20 homolog (yeast)-like | NA |  |
| TREML1  | -2.16 | -1.02 | 0.0009 | triggering receptor expressed on myeloid cells-like 1               | NA |  |
| TSFM    | -0.03 | 1.00  | 0.0103 | Ts translation elongation factor, mitochondrial                     |    |  |
| UBAP2   | -1.65 | -0.64 | 0.0250 | ubiquitin associated protein 2                                      |    |  |
| UBE3C   | -0.65 | 0.43  | 0.0014 | ubiquitin protein ligase E3C                                        | +  |  |
| UNKL    | -2.10 | -1.08 | 0.0010 | unkempt homolog (Drosophila)-like                                   |    |  |
| VAMP3   | -1.47 | -0.33 | 0.0014 | vesicle-associated membrane protein 3 (cellubrevin)                 |    |  |
| WDFY3   | -0.97 | 0.15  | 0.0014 | WD repeat and FYVE domain containing 3                              |    |  |
| XPA     | -0.84 | 0.31  | 0.0089 | xeroderma pigmentosum, complementation group A                      | +  |  |
| ZCCHC17 | -2.06 | -0.78 | 0.0010 | zinc finger, CCHC domain containing 17                              | NA |  |
| ZFX     | -2.78 | -1.77 | 0.0406 | zinc finger protein, X-linked                                       |    |  |
| ZNF502  | -2.65 | -1.39 | 0.0425 | zinc finger protein 502                                             | NA |  |
| ZNF540  | -2.59 | -1.58 | 0.0302 | zinc finger protein 540                                             | NA |  |
| ZNF764  | -0.27 | 0.94  | 0.0042 | zinc finger protein 764                                             | +  |  |
| ZNF831  | -0.78 | 0.50  | 0.0309 | zinc finger protein 831                                             | NA |  |

\*Genes that were underexpressed in MDS bone marrow CD34+ gene expression data are indicated with +. NA refers to genes not found in the meta-analytical dataset.

A significantly higher proportion of the hypermethylated genes were found to be underexpressed in the bone marrow gene expression dataset (Proportions test,  $P < 0.05$ , 41% underexpressed and 21% overexpressed in MDS).

**Supplementary Table 2: Significantly hypomethylated loci with mean log (HpaII/MspI) ratios**

| Symbol       | Mean HELP ratio MDS | Mean HELP ratio Normals | p-value  | Gene                                     |
|--------------|---------------------|-------------------------|----------|------------------------------------------|
| IGF2R        | 0.359626            | -1.03951                | 0.026736 | insulin-like growth factor 2 receptor    |
| KIAA1239     | -1.85303            | -2.88467                | 0.021872 | KIAA1239                                 |
| LOC100131490 | 1.241382            | 0.234222                | 0.00222  | hypothetical LOC100131490                |
| MTMR9        | -1.25005            | -2.67926                | 0.041733 | myotubularin related protein 9           |
| PON3         | -0.58988            | -2.60105                | 0.002136 | paraoxonase 3                            |
| SEC23B       | -1.52286            | -2.69926                | 0.009693 | Sec23 homolog B ( <i>S. cerevisiae</i> ) |
| SGK269       | -1.46313            | -2.82733                | 0.009747 | NKF3 kinase family member                |
| SLC47A1      | -0.97891            | -2.266                  | 0.005183 | solute carrier family 47, member 1       |
| ZNF219       | -1.77894            | -2.80356                | 0.038723 | zinc finger protein 219                  |

Supp Figure 1: Hypermethylation of genes seen in the array are validated by MassArray : The mean methylation ( $\log_2(\text{HpaII}/\text{MspI})$ ) for promoters of KLF3 reveals significant hypermethylation in MDS samples when compared to controls. Correlation between results of quantitative methylation obtained after MassArray sequencing reveals good correlation with the HELP assay data (B). MassArray epigrams reveal sequencing results of multiple CGs in the KLF3 promoter. MDS patients have hypermethylation of multiple CGs when compared to controls as evident from change in color from red to yellow. The black arrows represent CG dinucleotides and the red arrow represents an HpaII site (CCGG) (C).

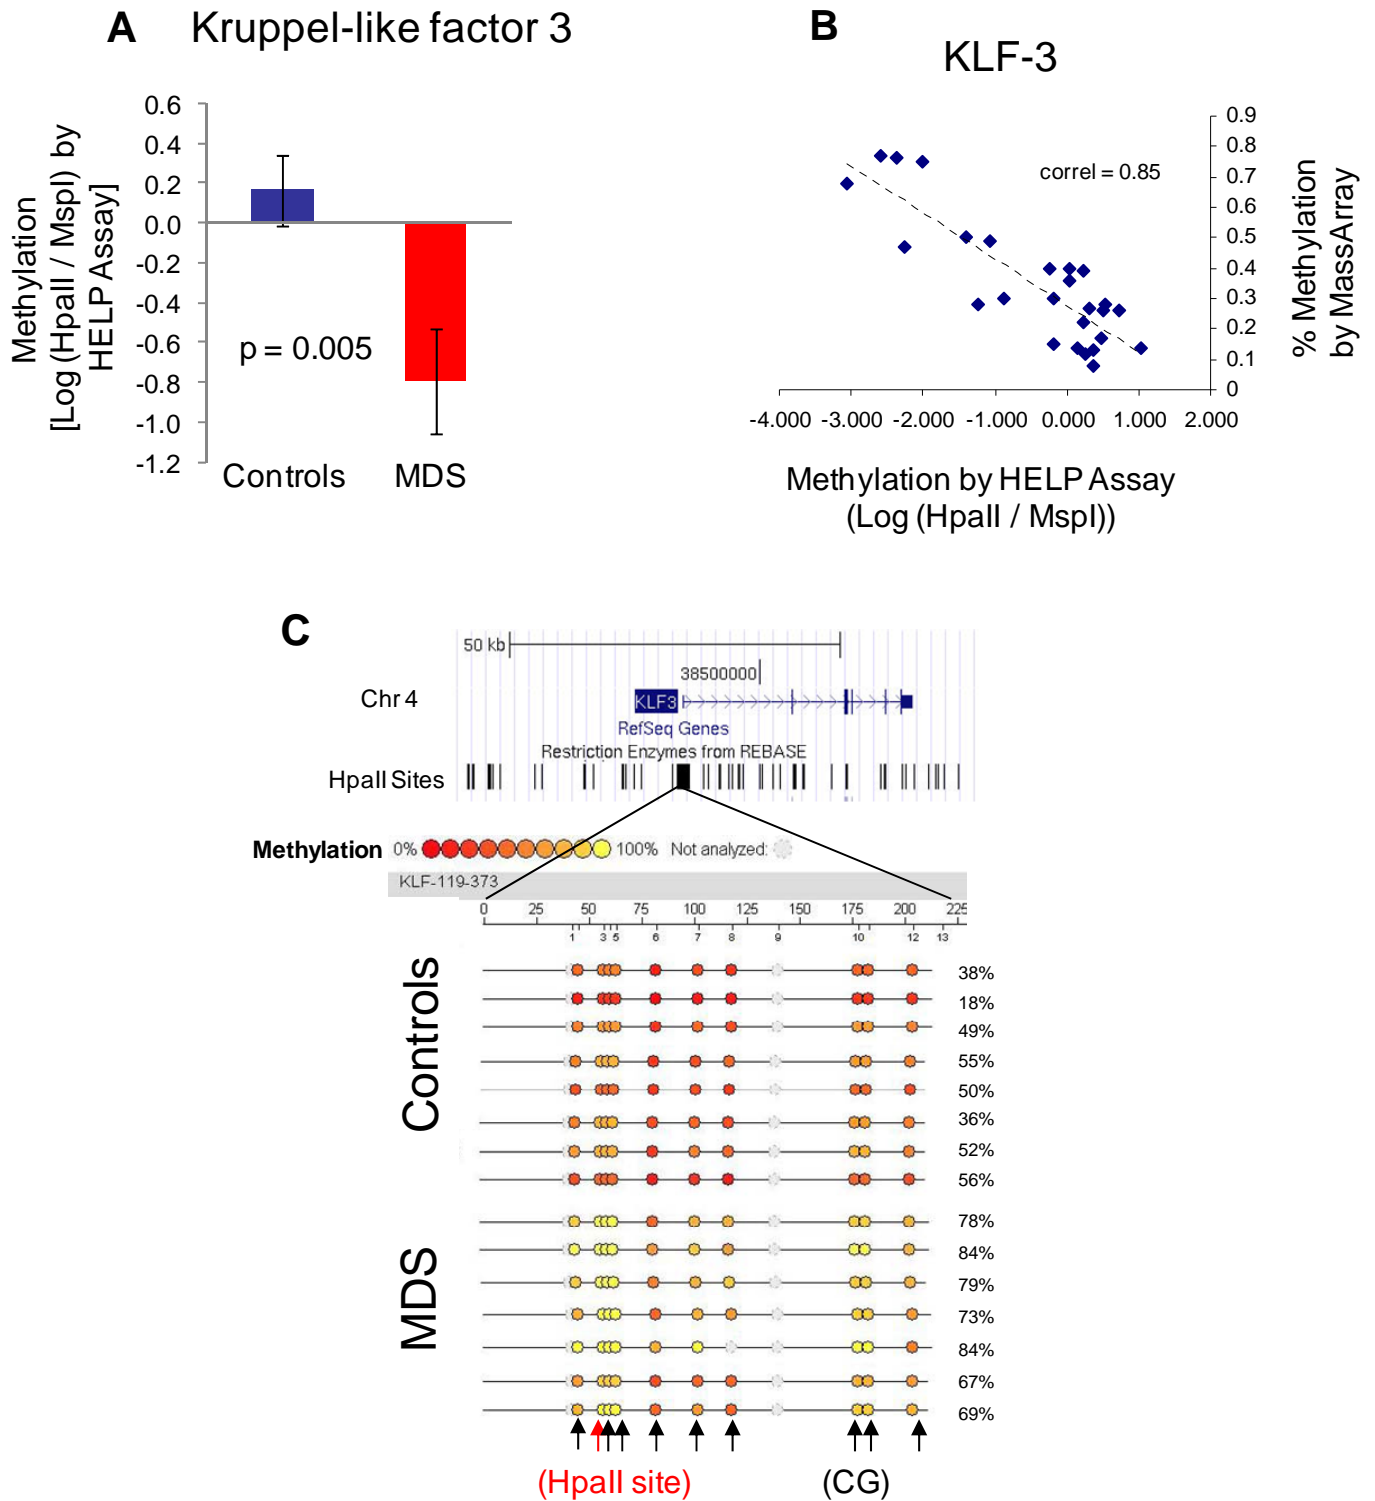

Supplementary Figure 2 : Functional pathways involved by hypermethylated genes in MDS

Analysis: MDShypermeth - 2009-04-20 12:32 PM

■ MDShypermeth - 2009-04-20 12:32 PM

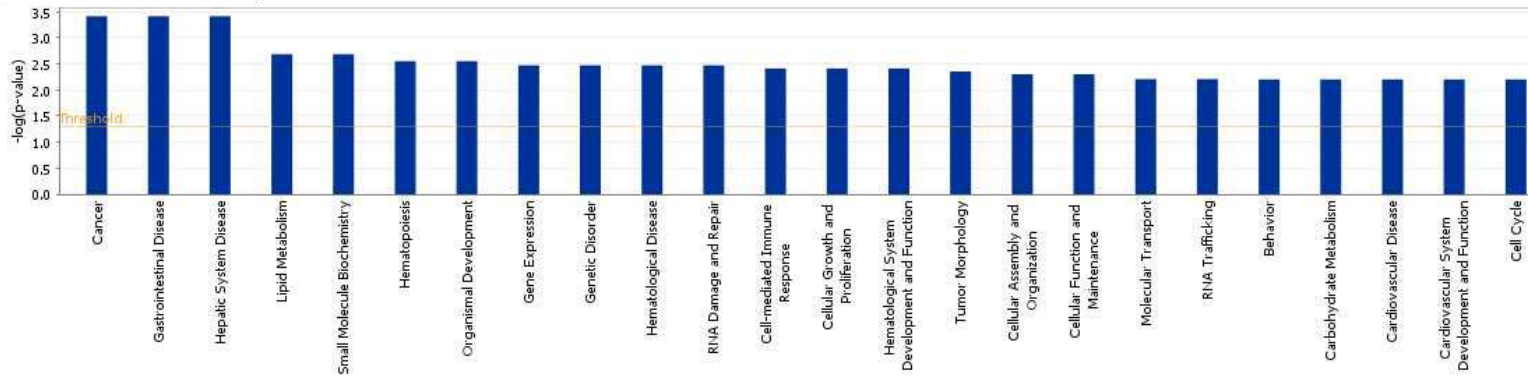

© 2000-2009 Ingenuity Systems, Inc. All rights reserved.
